# Supplementary material for: Structural changes within the alkaline earth uranyl phosphites
Source: Royal Society of Chemistry journal article supplement (doi:10.1039/c3dt50769f), 2013-01-01
Supplement: c3dt50769f.pdf [file c3dt50769f.pdf]

Electronic Supplemental Information for

## Structural Changes in the Alkaline Earth Uranyl Phosphites

Eric M. Villa, Juan Diwu, Evgeny V. Alekseev, Wulf Depmeier, Thomas E. Albrecht-Schmitt

### Section 1: Results

|                                                                                                                                    |    |
|------------------------------------------------------------------------------------------------------------------------------------|----|
| Section 1.1: $[(\text{Ca}^{2+})_{1.81}(\text{UO}_2^{2+})_{0.19}][(\text{UO}_2)_2(\text{HPO}_3)_4] \cdot 5\text{H}_2\text{O}$ ..... | 2  |
| Section 1.2: $\text{Sr}[(\text{UO}_2)(\text{HPO}_3)_2] \cdot 2\text{H}_2\text{O}$ .....                                            | 6  |
| Section 1.3: $\text{Ba}_2[(\text{UO}_2)_2(\text{HPO}_3)_4] \cdot 5\text{H}_2\text{O}$ .....                                        | 9  |
| Section 1.4: $\text{Ba}[\text{U}^{\text{IV}}(\text{PO}_4)_2]$ .....                                                                | 12 |
| Section 2: References .....                                                                                                        | 15 |

**Section 1.1:**  $[(\text{Ca}^{2+})_{1.81}(\text{UO}_2^{2+})_{0.19}][(\text{UO}_2)_2(\text{HPO}_3)_4] \cdot 5\text{H}_2\text{O}$ .

**Table 1.1.1:** Selected bond distances for  $[(\text{Ca}^{2+})_{1.81}(\text{UO}_2^{2+})_{0.19}][(\text{UO}_2)_2(\text{HPO}_3)_4] \cdot 5\text{H}_2\text{O}$ .

| Bond Distances (Å) for $[(\text{Ca}^{2+})_{1.81}(\text{UO}_2^{2+})_{0.19}][(\text{UO}_2)_2(\text{HPO}_3)_4] \cdot 5\text{H}_2\text{O}$ |           |              |           |
|----------------------------------------------------------------------------------------------------------------------------------------|-----------|--------------|-----------|
| U(1)-O(2)                                                                                                                              | 1.759(9)  | P(2)-O(7)#4  | 1.520(10) |
| U(1)-O(1)                                                                                                                              | 1.774(9)  | P(2)-O(8)#5  | 1.528(14) |
| U(1)-O(4)                                                                                                                              | 2.304(9)  | P(2)-O(3)    | 1.532(9)  |
| U(1)-O(3)                                                                                                                              | 2.338(8)  | Ca(1)-O(8)   | 2.270(14) |
| U(1)-O(7)                                                                                                                              | 2.365(8)  | Ca(1)-O(3W)  | 2.298(12) |
| U(1)-O(6)#1                                                                                                                            | 2.474(9)  | Ca(1)-O(6)#3 | 2.333(8)  |
| U(1)-O(5)                                                                                                                              | 2.487(10) | Ca(1)-O(5)   | 2.338(9)  |
| P(1)-O(6)                                                                                                                              | 1.520(9)  | Ca(1)-O(2W)  | 2.367(13) |
| P(1)-O(5)#5                                                                                                                            | 1.523(9)  | Ca(1)-O(7)#4 | 2.468(11) |
| P(1)-O(4)                                                                                                                              | 1.537(10) | Ca(1)-O(3)   | 2.491(10) |

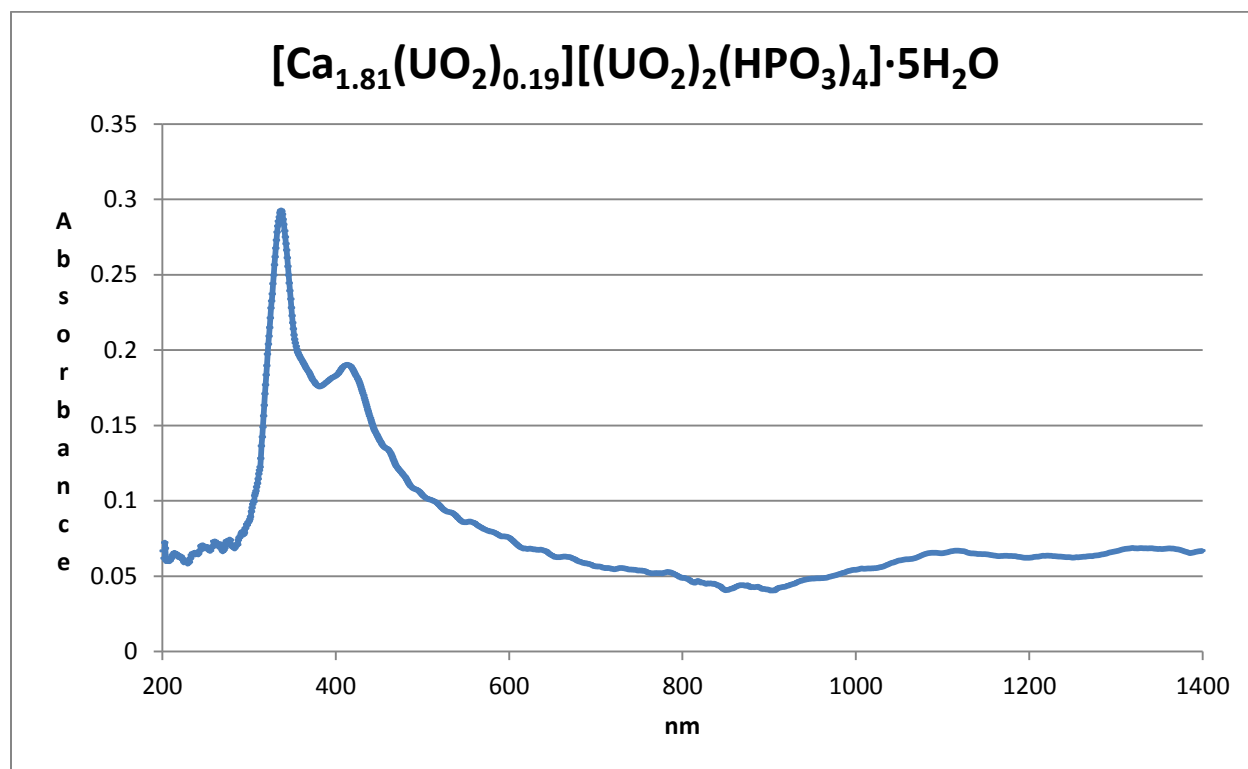

**Figure 1.1.1:** UV-vis-NIR absorbance for  $[(\text{Ca}^{2+})_{1.81}(\text{UO}_2^{2+})_{0.19}][(\text{UO}_2)_2(\text{HPO}_3)_4] \cdot 5\text{H}_2\text{O}$ . The characteristic  $\text{U}^{6+}$  transitions are seen between 370-500 nm.<sup>1</sup>

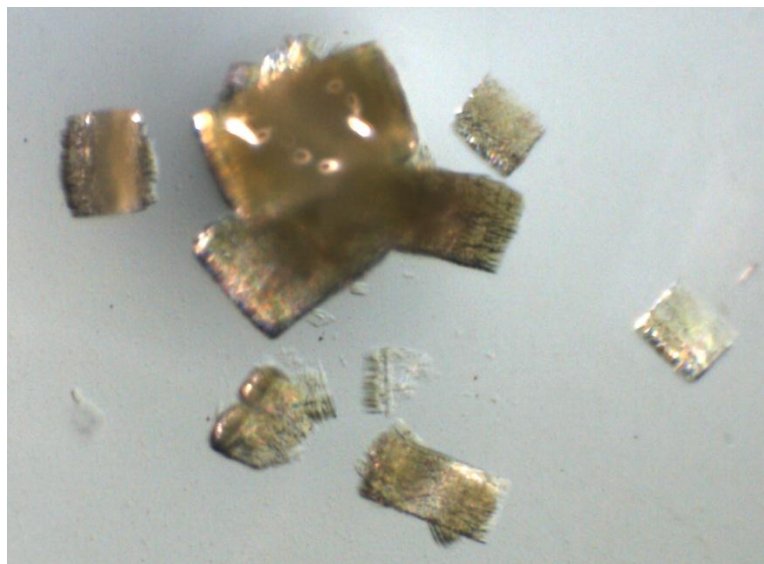

**Figure 1.1.2:** Picture of the crystals of  $[(\text{Ca}^{2+})_{1.81}(\text{UO}_2^{2+})_{0.19}][(\text{UO}_2)_2(\text{HPO}_3)_4] \cdot 5\text{H}_2\text{O}$ .

**Table 1.1.2:** Bond Valence Sum (BVS) calculations for  $[(Ca^{2+})_{1.81}(UO_2^{2+})_{0.19}][(UO_2)_2(HPO_3)_4] \cdot 5H_2O \cdot 2$

O1,O2 are terminal uranyl oxo groups  
 O8 is a terminal P-O unit  
 $vu = \exp[(R0 - d)/b]$

| Phosphite                                                                                                                                                                                                                                                                                    |          |           |       | U(VI)                                                                                                                                                                                                |          |           |       | R(0) : Ca-O                                                   |    |      |            | Total                  |       |              |
|----------------------------------------------------------------------------------------------------------------------------------------------------------------------------------------------------------------------------------------------------------------------------------------------|----------|-----------|-------|------------------------------------------------------------------------------------------------------------------------------------------------------------------------------------------------------|----------|-----------|-------|---------------------------------------------------------------|----|------|------------|------------------------|-------|--------------|
|                                                                                                                                                                                                                                                                                              | distance | vu        |       |                                                                                                                                                                                                      | distance | vu        |       | distance                                                      | vu |      |            |                        |       |              |
| R(0) : P-O                                                                                                                                                                                                                                                                                   | 1.626    | O(1)      |       | R(0) : U-O                                                                                                                                                                                           | 2.051    | U(1)-O(1) | 1.774 | 1.705                                                         |    |      |            | <b>1.705</b>           |       |              |
| b                                                                                                                                                                                                                                                                                            | 0.37     | O(2)      |       | b                                                                                                                                                                                                    | 0.519    | U(1)-O(2) | 1.759 | 1.755                                                         | b  | 0.37 | O(2)       | <b>1.755</b>           |       |              |
|                                                                                                                                                                                                                                                                                              |          | P(2)-O(3) | 1.532 | 1.289                                                                                                                                                                                                |          | U(1)-O(3) | 2.338 | 0.575                                                         |    |      | Ca(1)-O(3) | 2.491                  | 0.243 | <b>2.107</b> |
|                                                                                                                                                                                                                                                                                              |          | P(1)-O(4) | 1.537 | 1.272                                                                                                                                                                                                |          | U(1)-O(4) | 2.304 | 0.614                                                         |    |      | O(4)       |                        |       | <b>1.886</b> |
|                                                                                                                                                                                                                                                                                              |          | P(1)-O(5) | 1.523 | 1.321                                                                                                                                                                                                |          | U(1)-O(5) | 2.487 | 0.432                                                         |    |      | Ca(1)-O(5) | 2.338                  | 0.367 | <b>2.120</b> |
|                                                                                                                                                                                                                                                                                              |          | P(1)-O(6) | 1.52  | 1.332                                                                                                                                                                                                |          | U(1)-O(6) | 2.474 | 0.443                                                         |    |      | Ca(1)-O(6) | 2.333                  | 0.372 | <b>2.146</b> |
|                                                                                                                                                                                                                                                                                              |          | P(2)-O(7) | 1.52  | 1.332                                                                                                                                                                                                |          | U(1)-O(7) | 2.365 | 0.546                                                         |    |      | Ca(1)-O(7) | 2.468                  | 0.258 | <b>2.136</b> |
|                                                                                                                                                                                                                                                                                              |          | P(2)-O(8) | 1.528 | 1.303                                                                                                                                                                                                |          | O(8)      |       |                                                               |    |      | Ca(1)-O(8) | 2.27                   | 0.441 | <b>1.744</b> |
|                                                                                                                                                                                                                                                                                              |          |           |       |                                                                                                                                                                                                      |          |           |       |                                                               |    |      | Ca(1)-O2W  | 2.367                  | 0.339 | <b>0.339</b> |
|                                                                                                                                                                                                                                                                                              |          |           |       |                                                                                                                                                                                                      |          |           |       |                                                               |    |      | Ca(1)-O3W  | 2.298                  | 0.409 | <b>0.409</b> |
| <div style="border: 1px solid black; padding: 5px; width: fit-content;">                     P1-O4,O5,O6<br/>                     P2-O3,O7,O8<br/><br/>                     H(P1)= -0.152<br/>                     H(P2)= 0.013<br/>                     Zero Protons                 </div> |          |           |       | R(0) : U-O 2.051 U(1)-O(1) 1.774 1.705<br>b 0.519 U(1)-O(2) 1.759 1.755<br>U(1)-O(3) 2.338 0.575<br>U(1)-O(4) 2.304 0.614<br>U(1)-O(5) 2.487 0.432<br>U(1)-O(6) 2.474 0.443<br>U(1)-O(7) 2.365 0.546 |          |           |       | BVS for Phosphites<br>HP(3+)-O(2-)<br>Should Equal 4+ for PO3 |    |      |            | <b>Ca(1) BVS 2.428</b> |       |              |
|                                                                                                                                                                                                                                                                                              |          |           |       | <b>U(1) BVS 6.070</b>                                                                                                                                                                                |          |           |       | P(1)BVS 3.925<br>P(2)BVS 3.924                                |    |      |            |                        |       |              |
|                                                                                                                                                                                                                                                                                              |          |           |       |                                                                                                                                                                                                      |          |           |       |                                                               |    |      |            |                        |       |              |
|                                                                                                                                                                                                                                                                                              |          |           |       |                                                                                                                                                                                                      |          |           |       |                                                               |    |      |            |                        |       |              |
|                                                                                                                                                                                                                                                                                              |          |           |       |                                                                                                                                                                                                      |          |           |       |                                                               |    |      |            |                        |       |              |
|                                                                                                                                                                                                                                                                                              |          |           |       |                                                                                                                                                                                                      |          |           |       |                                                               |    |      |            |                        |       |              |

**Figure 1.1.3:** EDS/SEM image and elemental analysis by weight % for  $[(Ca^{2+})_{1.81}(UO_2^{2+})_{0.19}][(UO_2)_2(HPO_3)_4] \cdot 5H_2O$ .

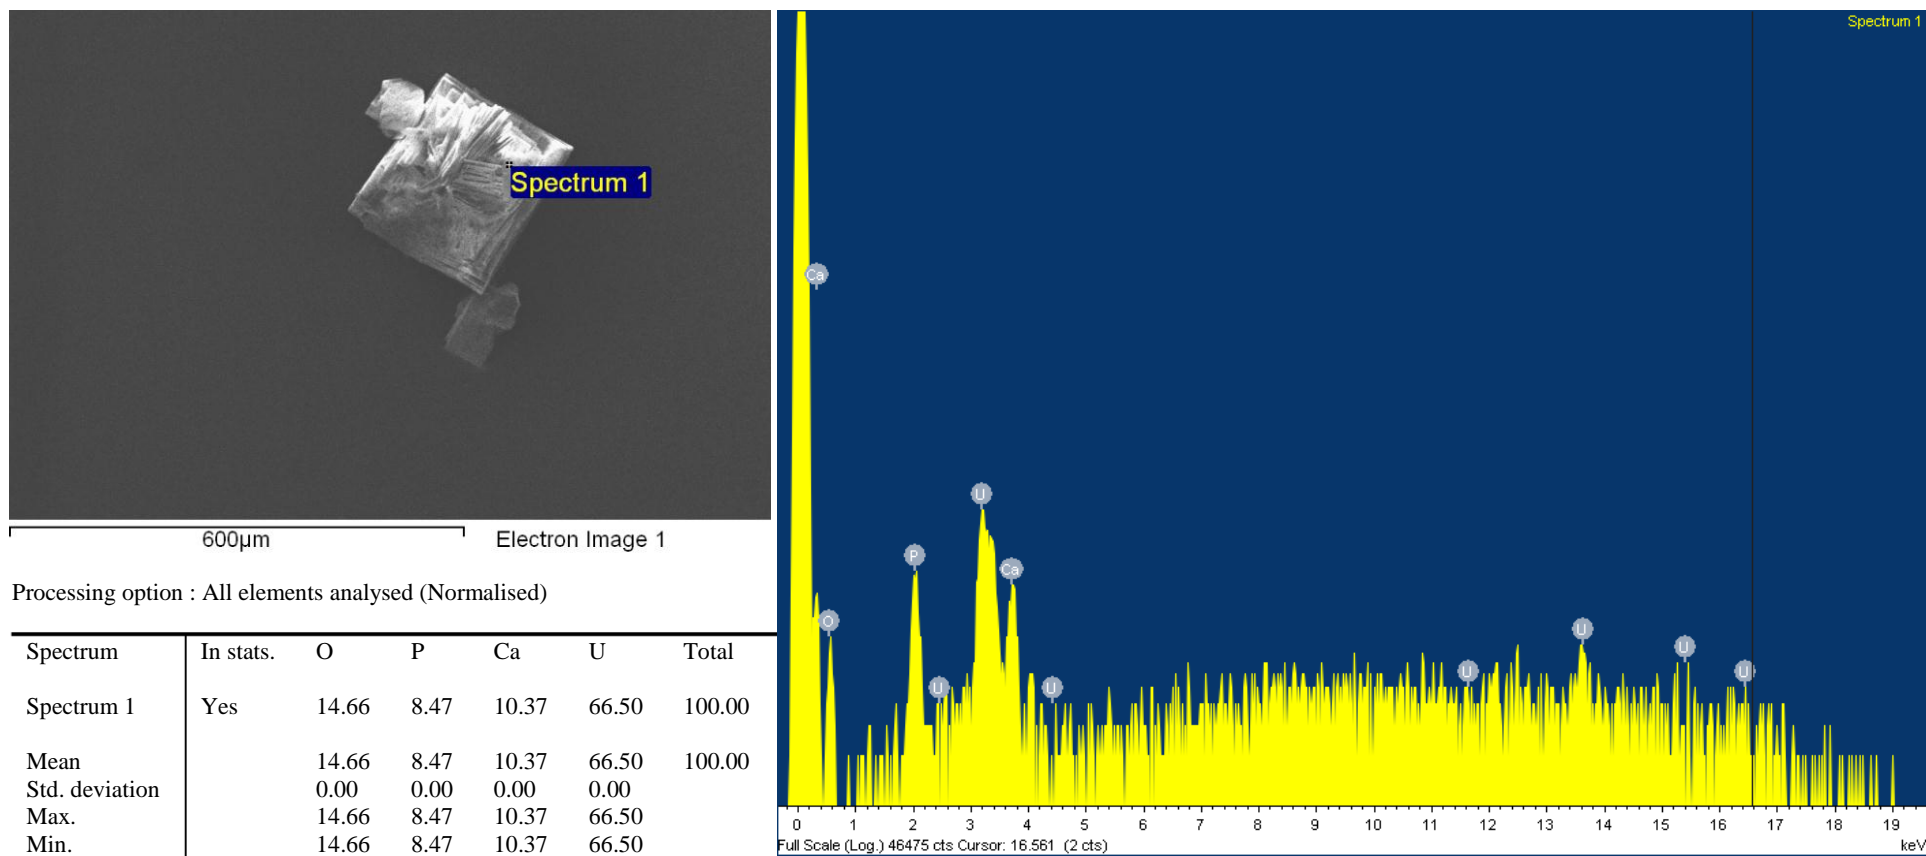

All results in weight%

## Section 1.2: Sr[(UO<sub>2</sub>)(HPO<sub>3</sub>)<sub>2</sub>] $\cdot$ 2H<sub>2</sub>O.

**Table 1.2.1:** Selected bond distances for Sr[(UO<sub>2</sub>)(HPO<sub>3</sub>)<sub>2</sub>] $\cdot$ 2H<sub>2</sub>O.

| Bond Distances (Å) for Sr[(UO <sub>2</sub> )(HPO <sub>3</sub> ) <sub>2</sub> ] $\cdot$ 2H <sub>2</sub> O |          |               |          |
|----------------------------------------------------------------------------------------------------------|----------|---------------|----------|
| U(1)-O(7)                                                                                                | 1.789(7) | P(2)-O(3)     | 1.492(6) |
| U(1)-O(6)                                                                                                | 1.800(6) | P(2)-O(8)#2   | 1.531(6) |
| U(1)-O(4)                                                                                                | 2.295(5) | P(2)-O(4)     | 1.538(6) |
| U(1)-O(8)                                                                                                | 2.300(6) | Sr(1)-O(1)#3  | 2.482(6) |
| U(1)-O(2)#1                                                                                              | 2.341(6) | Sr(1)-O(5)#2  | 2.517(6) |
| U(1)-O(5)                                                                                                | 2.413(5) | Sr(1)-O(3)#4  | 2.557(6) |
| U(1)-O(2)                                                                                                | 2.535(6) | Sr(1)-O(3)    | 2.559(6) |
| P(1)-O(1)                                                                                                | 1.488(7) | Sr(1)-O(1W)#4 | 2.604(7) |
| P(1)-O(5)                                                                                                | 1.522(6) | Sr(1)-O(2W)   | 2.625(6) |
| P(1)-O(2)                                                                                                | 1.569(6) | Sr(1)-O(6)#5  | 2.684(6) |
|                                                                                                          |          | Sr(1)-O(8)#2  | 2.891(6) |

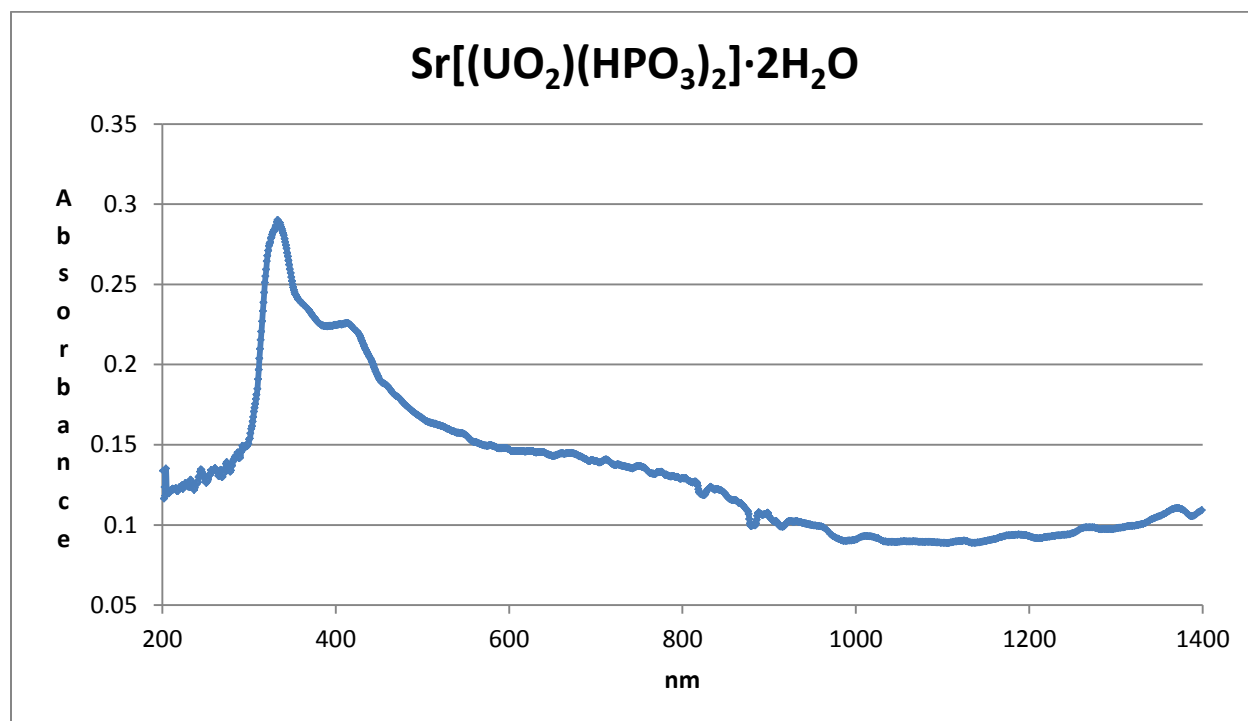

**Figure 1.2.1:** UV-vis-NIR absorbance for Sr[(UO<sub>2</sub>)(HPO<sub>3</sub>)<sub>2</sub>]·2H<sub>2</sub>O. The characteristic U<sup>6+</sup> transitions are seen between 370-500 nm.<sup>1</sup>

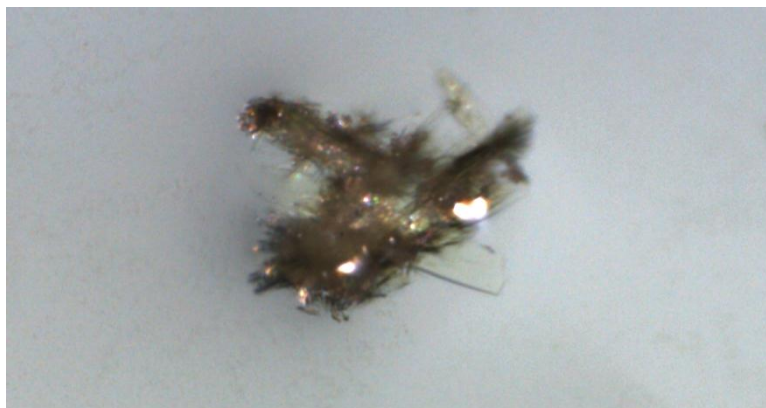

**Figure 1.2.2:** Picture of the crystals of Sr[(UO<sub>2</sub>)(HPO<sub>3</sub>)<sub>2</sub>]·2H<sub>2</sub>O.

**Table 1.2.2:** Bond Valence Sum (BVS) calculations for Sr[(UO<sub>2</sub>)(HPO<sub>3</sub>)<sub>2</sub>].2H<sub>2</sub>O.<sup>2</sup>

O6,O7 are terminal uranyl oxo groups  
 O1,O3 are terminal P-O units

vu = exp[(R0 - d)/b]

| Phosphite  |          |      |           | U(VI)      |          |       |           |
|------------|----------|------|-----------|------------|----------|-------|-----------|
| R(0) : P-O | distance | vu   |           | R(0) : U-O | distance | vu    |           |
| b          | 1.626    | 0.37 | P(1)-O(1) | 2.051      | 2.535    | 0.394 | O(1)      |
|            |          |      | P(1)-O(2) | 0.519      | 2.535    | 0.394 | O(2)-U(1) |
|            |          |      | P(2)-O(3) |            | 2.295    | 0.625 | O(3)      |
|            |          |      | P(2)-O(4) |            | 2.295    | 0.625 | U(1)-O(4) |
|            |          |      | P(1)-O(5) |            | 2.413    | 0.498 | U(1)-O(5) |
|            |          |      | O(6)      |            | 1.8      | 1.622 | U(1)-O(6) |
|            |          |      | O(7)      |            | 1.789    | 1.657 | U(1)-O(7) |
|            |          |      | P(2)-O(8) |            | 2.3      | 0.619 | U(1)-O(8) |

  

| R(0) : Sr-O | distance | vu   |            | distance | vu    | Total        |
|-------------|----------|------|------------|----------|-------|--------------|
| b           | 2.118    | 0.37 | Sr(1)-O(1) | 2.482    | 0.374 | <b>1.826</b> |
|             |          |      | O(2)       |          |       | <b>2.132</b> |
|             |          |      | Sr(1)-O(3) | 2.557    | 0.305 | <b>2.045</b> |
|             |          |      | O(4)       |          |       | <b>1.893</b> |
|             |          |      | Sr(1)-O(5) | 2.517    | 0.340 | <b>2.163</b> |
|             |          |      | Sr(1)-O(6) | 2.684    | 0.217 | <b>1.839</b> |
|             |          |      | O(7)       |          |       | <b>1.657</b> |
|             |          |      | Sr(1)-O(8) | 2.891    | 0.124 | <b>2.035</b> |
|             |          |      | Sr(1)-O1W  | 2.604    | 0.269 | <b>0.269</b> |
|             |          |      | Sr(1)-O2W  | 2.625    | 0.254 | <b>0.254</b> |

|              |        |
|--------------|--------|
| P1-O1,O2,O5  |        |
| P2-O3,O4,O8  |        |
| H(P1)=       | -0.120 |
| H(P2)=       | 0.026  |
| Zero Protons |        |

|                 |       |           |       |              |
|-----------------|-------|-----------|-------|--------------|
| R(0) : U-O      | 2.051 | U(1)-O(2) | 2.535 | 0.394        |
| b               | 0.519 | O(2)-U(1) | 2.341 | 0.572        |
|                 |       | U(1)-O(4) | 2.295 | 0.625        |
|                 |       | U(1)-O(5) | 2.413 | 0.498        |
|                 |       | U(1)-O(6) | 1.8   | 1.622        |
|                 |       | U(1)-O(7) | 1.789 | 1.657        |
|                 |       | U(1)-O(8) | 2.3   | 0.619        |
| <b>U(1) BVS</b> |       |           |       | <b>5.986</b> |

BVS for Phosphites  
 HP(3+)-O(2-)  
 Should Equal 4+ for PO3

|         |       |
|---------|-------|
| P(1)BVS | 3.943 |
| P(2)BVS | 3.998 |

|                  |              |
|------------------|--------------|
| <b>Sr(1) BVS</b> | <b>2.186</b> |
|------------------|--------------|



### Section 1.3: Ba<sub>2</sub>[(UO<sub>2</sub>)<sub>2</sub>(HPO<sub>3</sub>)<sub>4</sub>]·5H<sub>2</sub>O.

Table 1.3.1: Selected bond distances for Ba<sub>2</sub>[(UO<sub>2</sub>)<sub>2</sub>(HPO<sub>3</sub>)<sub>4</sub>]·5H<sub>2</sub>O.

|              |          |               |          |
|--------------|----------|---------------|----------|
| U(1)-O(12)   | 1.775(6) | P(4)-O(4)     | 1.511(5) |
| U(1)-O(7)    | 1.788(5) | P(4)-O(9)#8   | 1.534(6) |
| U(1)-O(16)#1 | 2.296(6) | P(4)-O(8)#9   | 1.547(5) |
| U(1)-O(8)    | 2.318(5) | Ba(1)-O(14)#2 | 2.723(5) |
| U(1)-O(13)#2 | 2.341(5) | Ba(1)-O(10)#5 | 2.726(4) |
| U(1)-O(2)#2  | 2.494(6) | Ba(1)-O(2W)   | 2.760(7) |
| U(1)-O(14)#2 | 2.515(5) | Ba(1)-O(5)    | 2.832(5) |
| U(2)-O(11)   | 1.765(6) | Ba(1)-O(1)#4  | 2.846(6) |
| U(2)-O(3)    | 1.791(5) | Ba(1)-O(4)#4  | 2.860(5) |
| U(2)-O(15)#4 | 2.275(7) | Ba(1)-O(1W)   | 2.935(6) |
| U(2)-O(9)    | 2.316(5) | Ba(1)-O(8)    | 3.076(5) |
| U(2)-O(5)    | 2.339(5) | Ba(1)-O(15)#4 | 3.122(7) |
| U(2)-O(2)    | 2.514(6) | Ba(1)-O(10)   | 3.217(6) |
| U(2)-O(6)    | 2.529(5) | Ba(2)-O(1)    | 2.728(5) |
| P(1)-O(1)    | 1.508(5) | Ba(2)-O(6)    | 2.777(6) |
| P(1)-O(16)   | 1.526(6) | Ba(2)-O(13)#6 | 2.805(5) |
| P(1)-O(15)   | 1.546(7) | Ba(2)-O(4W)   | 2.827(8) |
| P(2)-O(10)   | 1.515(5) | Ba(2)-O(1W)#7 | 2.914(6) |
| P(2)-O(5)    | 1.534(6) | Ba(2)-O(1)#8  | 2.928(6) |
| P(2)-O(13)   | 1.544(5) | Ba(2)-O(4)    | 2.928(5) |
| P(3)-O(14)   | 1.515(6) | Ba(2)-O(16)#8 | 2.975(6) |
| P(3)-O(6)    | 1.524(6) | Ba(2)-O(4)#8  | 2.976(6) |
| P(3)-O(2)    | 1.559(5) | Ba(2)-O(9)    | 3.001(5) |
|              |          | Ba(2)-O(10)#6 | 3.098(6) |

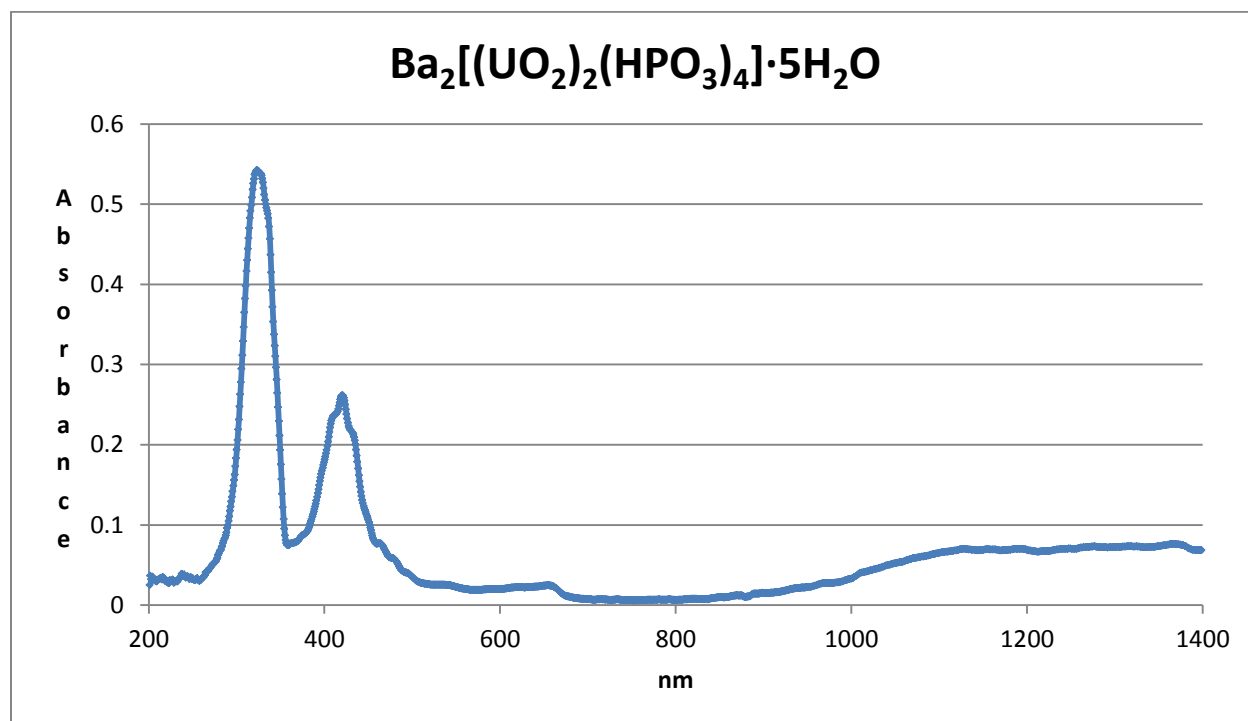

**Figure 1.3.1:** UV-vis-NIR absorbance for Ba<sub>2</sub>[(UO<sub>2</sub>)<sub>2</sub>(HPO<sub>3</sub>)<sub>4</sub>]·5H<sub>2</sub>O. The characteristic U<sup>6+</sup> transitions are seen between 370-500 nm.<sup>1</sup>

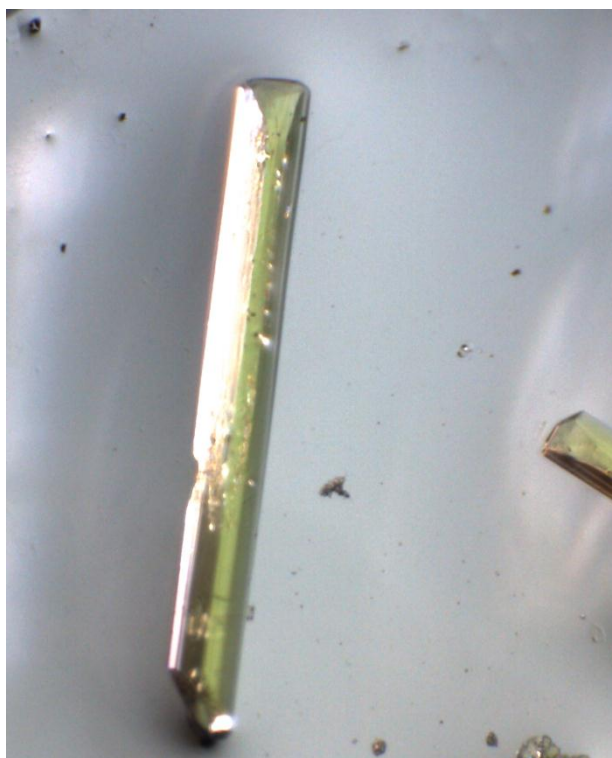

**Figure 1.3.2:** Picture of the crystals of Ba<sub>2</sub>[(UO<sub>2</sub>)<sub>2</sub>(HPO<sub>3</sub>)<sub>4</sub>]·5H<sub>2</sub>O.

**Table 1.3.2: Bond Valence Sum (BVS) calculations for Ba<sub>2</sub>[(UO<sub>2</sub>)<sub>2</sub>(HPO<sub>3</sub>)<sub>4</sub>]·5H<sub>2</sub>O.<sup>2</sup>**

O3,O7,O11,O12 are terminal uranyl oxo groups  
O4,O10 are terminal P-O units

$vu = \exp[(R0 - d)/b]$

| Phosphite   | R(0) : P-O | b           | distance | vu              | U(VI)        | R(0) : U-O | b     | distance        | vu           | distance   | vu                      | distance     | vu        |       |       |
|-------------|------------|-------------|----------|-----------------|--------------|------------|-------|-----------------|--------------|------------|-------------------------|--------------|-----------|-------|-------|
| P(1)-O(1)   | 1.626      |             | 1.508    | 1.376           | U(1)-O(7)    | 2.051      |       | 1.788           | 1.660        | U(2)-O(2)  | 2.514                   | 0.410        |           |       |       |
| P(3)-O(2)   | 0.37       |             | 1.559    | 1.199           | U(1)-O(8)    | 0.519      |       | 2.318           | 0.598        | U(2)-O(3)  | 1.791                   | 1.650        | U(1)-O(2) | 2.494 | 0.426 |
| O(3)        |            |             |          |                 | U(1)-O(12)   |            |       | 1.775           | 1.702        | U(2)-O(5)  | 2.339                   | 0.574        |           |       |       |
| P(4)-O(4)   |            |             | 1.511    | 1.365           | U(1)-O(13)   |            |       | 2.341           | 0.572        | U(2)-O(6)  | 2.529                   | 0.398        |           |       |       |
| P(2)-O(5)   |            |             | 1.534    | 1.282           | U(1)-O(14)   |            |       | 2.515           | 0.409        | U(2)-O(9)  | 2.316                   | 0.600        |           |       |       |
| P(3)-O(6)   |            |             | 1.524    | 1.317           | U(1)-O(15)   |            |       | 2.275           | 0.649        | U(2)-O(11) | 1.765                   | 1.735        |           |       |       |
| O(7)        |            |             |          |                 | U(1)-O(16)   |            |       | 2.296           | 0.624        | O(10)      |                         |              |           |       |       |
| P(4)-O(8)   |            |             | 1.547    | 1.238           |              |            |       |                 |              | U(2)-O(15) | 2.275                   | 0.649        |           |       |       |
| P(4)-O(9)   |            |             | 1.534    | 1.282           |              |            |       |                 |              | U(1)-O(11) | 1.765                   | 1.735        |           |       |       |
| P(2)-O(10)  |            |             | 1.515    | 1.350           |              |            |       |                 |              | U(1)-O(12) | 1.775                   | 1.702        |           |       |       |
| O(11)       |            |             |          |                 |              |            |       |                 |              | U(1)-O(13) | 2.341                   | 0.572        |           |       |       |
| O(12)       |            |             |          |                 |              |            |       |                 |              | U(1)-O(14) | 2.515                   | 0.409        |           |       |       |
| P(2)-O(13)  |            |             | 1.544    | 1.248           |              |            |       |                 |              | U(2)-O(9)  | 2.316                   | 0.600        |           |       |       |
| P(3)-O(14)  |            |             | 1.515    | 1.350           |              |            |       |                 |              | U(2)-O(11) | 1.765                   | 1.735        |           |       |       |
| P(1)-O(15)  |            |             | 1.546    | 1.241           |              |            |       |                 |              | U(2)-O(15) | 2.275                   | 0.649        |           |       |       |
| P(1)-O(16)  |            |             | 1.526    | 1.310           |              |            |       |                 |              | U(1)-O(16) | 2.296                   | 0.624        |           |       |       |
|             |            |             | distance | vu              |              | distance   | vu    |                 | distance     | vu         | distance                | vu           | Total     |       |       |
| R(0) : Ba-O | 2.29       | Ba(1)-O(1)  | 2.846    | 0.223           | Ba(2)-O(1)   | 2.728      | 0.223 | Ba(2)-O(1)      | 2.928        | 0.306      |                         |              | 2.127     |       |       |
| b           | 0.37       | O(2)        |          |                 | O(2)         |            |       | O(2)            |              |            |                         |              | 2.034     |       |       |
|             |            | O(3)        |          |                 | O(3)         |            |       | O(3)            |              |            |                         |              | 1.650     |       |       |
|             |            | Ba(1)-O(4)  | 2.86     | 0.214           | Ba(2)-O(4)   | 2.928      | 0.214 | Ba(2)-O(4)      | 2.976        | 0.178      |                         |              | 1.971     |       |       |
|             |            | Ba(1)-O(5)  | 2.832    | 0.231           | Ba(1)-O(5)   |            |       | Ba(1)-O(5)      |              |            |                         |              | 2.088     |       |       |
|             |            | Ba(2)-O(6)  | 2.777    | 0.268           | Ba(2)-O(6)   |            |       | Ba(2)-O(6)      |              |            |                         |              | 1.984     |       |       |
|             |            | O(7)        |          |                 | O(7)         |            |       | O(7)            |              |            |                         |              | 1.660     |       |       |
|             |            | Ba(1)-O(8)  | 3.076    | 0.120           | Ba(1)-O(8)   |            |       | Ba(1)-O(8)      |              |            |                         |              | 1.955     |       |       |
|             |            | Ba(2)-O(9)  | 3.001    | 0.146           | Ba(2)-O(9)   |            |       | Ba(2)-O(9)      |              |            |                         |              | 2.029     |       |       |
|             |            | Ba(1)-O(10) | 2.726    | 0.308           | Ba(1)-O(10)  | 3.217      | 0.082 | Ba(2)-O(10)     | 3.098        | 0.082      |                         |              | 1.821     |       |       |
|             |            | O(11)       |          |                 | O(11)        |            |       | O(11)           |              |            |                         |              | 1.735     |       |       |
|             |            | O(12)       |          |                 | O(12)        |            |       | O(12)           |              |            |                         |              | 1.702     |       |       |
|             |            | Ba(2)-O(13) | 2.805    | 0.249           | Ba(2)-O(13)  |            |       | Ba(2)-O(13)     |              |            |                         |              | 2.069     |       |       |
|             |            | Ba(1)-O(14) | 2.723    | 0.310           | Ba(1)-O(14)  |            |       | Ba(1)-O(14)     |              |            |                         |              | 2.069     |       |       |
|             |            | Ba(1)-O(15) | 3.122    | 0.106           | Ba(1)-O(15)  |            |       | Ba(1)-O(15)     |              |            |                         |              | 1.996     |       |       |
|             |            | Ba(2)-O(16) | 2.975    | 0.157           | Ba(2)-O(16)  |            |       | Ba(2)-O(16)     |              |            |                         |              | 2.091     |       |       |
|             |            | Ba(1)-O1W   | 2.935    | 0.175           | Ba(2)-O1W    | 2.915      | 0.185 | Ba(1)-O1W       |              |            |                         |              | 0.360     |       |       |
|             |            | Ba(1)-O2W   | 2.761    | 0.280           | Ba(1)-O2W    |            |       | Ba(1)-O2W       |              |            |                         |              | 0.280     |       |       |
|             |            | Ba(2)-O4W   | 2.827    | 0.234           | Ba(2)-O4W    |            |       | Ba(2)-O4W       |              |            |                         |              | 0.234     |       |       |
|             |            | R(0) : U-O  | 2.051    | U(1)-O(7)       | 1.788        | 1.660      | 2.051 | U(2)-O(2)       | 2.514        | 0.410      | BVS for Phosphites      |              |           |       |       |
|             |            | b           | 0.519    | U(1)-O(8)       | 2.318        | 0.598      | 0.519 | U(2)-O(3)       | 1.791        | 1.650      | HP(3+)-O(2-)            |              |           |       |       |
|             |            |             |          | U(1)-O(12)      | 1.775        | 1.702      |       | U(2)-O(5)       | 2.339        | 0.574      | Should Equal 4+ for PO3 |              |           |       |       |
|             |            |             |          | U(1)-O(13)      | 2.341        | 0.572      |       | U(2)-O(6)       | 2.529        | 0.398      | P(1)BVS                 | 3.927        |           |       |       |
|             |            |             |          | U(1)-O(14)      | 2.515        | 0.409      |       | U(2)-O(9)       | 2.316        | 0.600      | P(2)BVS                 | 3.880        |           |       |       |
|             |            |             |          | U(1)-O(16)      | 2.296        | 0.624      |       | U(2)-O(11)      | 1.765        | 1.735      | P(3)BVS                 | 3.866        |           |       |       |
|             |            |             |          | U(1)-O(30)      | 2.35         | 0.562      |       | U(2)-O(15)      | 2.275        | 0.649      | P(4)BVS                 | 3.885        |           |       |       |
|             |            |             |          | <b>U(1) BVS</b> | <b>6.126</b> |            |       | <b>U(2) BVS</b> | <b>6.017</b> |            | <b>Ba(1) BVS</b>        | <b>2.048</b> |           |       |       |
|             |            |             |          |                 |              |            |       |                 |              |            | <b>Ba(2) BVS</b>        | <b>2.242</b> |           |       |       |

  

|                                                                                                                                                     |  |  |
|-----------------------------------------------------------------------------------------------------------------------------------------------------|--|--|
| P1-O1,O15,O16<br>P2-O5,O10,O13<br>P3-O2,O6,O14<br>P4-O4,O8,O9<br><br>H(P1)= -0.214<br>H(P2)= 0.023<br>H(P3)= -0.087<br>H(P4)= 0.044<br>Zero Protons |  |  |
|-----------------------------------------------------------------------------------------------------------------------------------------------------|--|--|

## Section 1.4: Ba[U<sup>IV</sup>(PO<sub>4</sub>)<sub>2</sub>].

**Table 1.4.1:** Selected bond distances for Ba[U<sup>IV</sup>(PO<sub>4</sub>)<sub>2</sub>].

| Bond Distances (Å) for Ba[U <sup>IV</sup> (PO <sub>4</sub> ) <sub>2</sub> ] |           |                |           |
|-----------------------------------------------------------------------------|-----------|----------------|-----------|
| U(1)-O(2)#1                                                                 | 2.230(15) | Ba(1A)-O(1W)#9 | 2.7845(4) |
| U(1)-O(2)#2                                                                 | 2.230(15) | Ba(1A)-O(1W)   | 2.7845(4) |
| U(1)-O(2)#3                                                                 | 2.230(15) | Ba(1A)-O(1)#10 | 2.826(14) |
| U(1)-O(2)#4                                                                 | 2.230(15) | Ba(1A)-O(1)#11 | 2.826(14) |
| U(1)-O(1)#5                                                                 | 2.456(15) | Ba(1A)-O(1)#12 | 2.826(14) |
| U(1)-O(1)#6                                                                 | 2.456(15) | Ba(1A)-O(1)#13 | 2.826(14) |
| U(1)-O(1)#7                                                                 | 2.456(15) | Ba(1A)-O(2)    | 3.296(13) |
| U(1)-O(1)                                                                   | 2.456(15) | Ba(1A)-O(2)#14 | 3.296(13) |
| P(1)-O(2)#7                                                                 | 1.517(14) | Ba(1A)-O(2)#7  | 3.296(13) |
| P(1)-O(2)                                                                   | 1.517(14) | Ba(1A)-O(2)#9  | 3.296(13) |
| P(1)-O(1)                                                                   | 1.541(17) |                |           |
| P(1)-O(1)#7                                                                 | 1.541(17) |                |           |

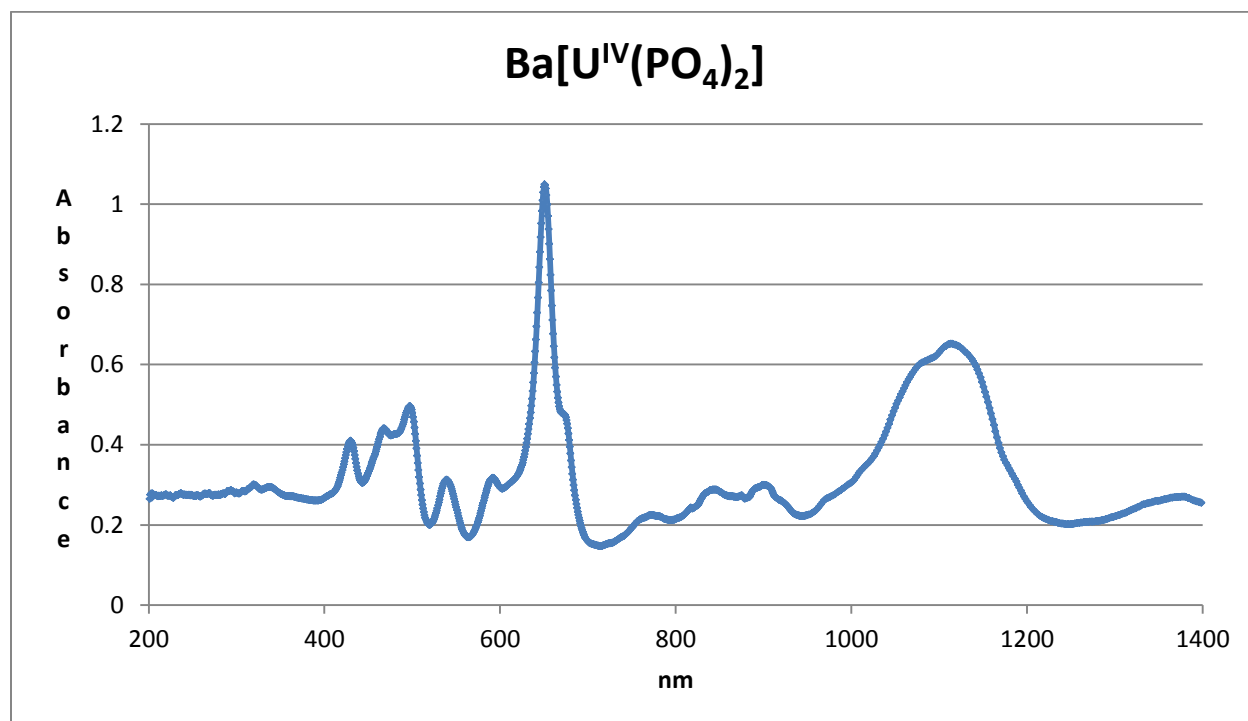

**Figure 1.4.1:** UV-vis-NIR absorbance for Ba[U<sup>IV</sup>(PO<sub>4</sub>)<sub>2</sub>]. The characteristic U<sup>4+</sup> transitions are observed at approximately 429, 486, 495, 549, 649, 672, 880, 1070 and 1133, with the transitions at 649, 1070 and 1133 being the largest observed.<sup>3</sup>

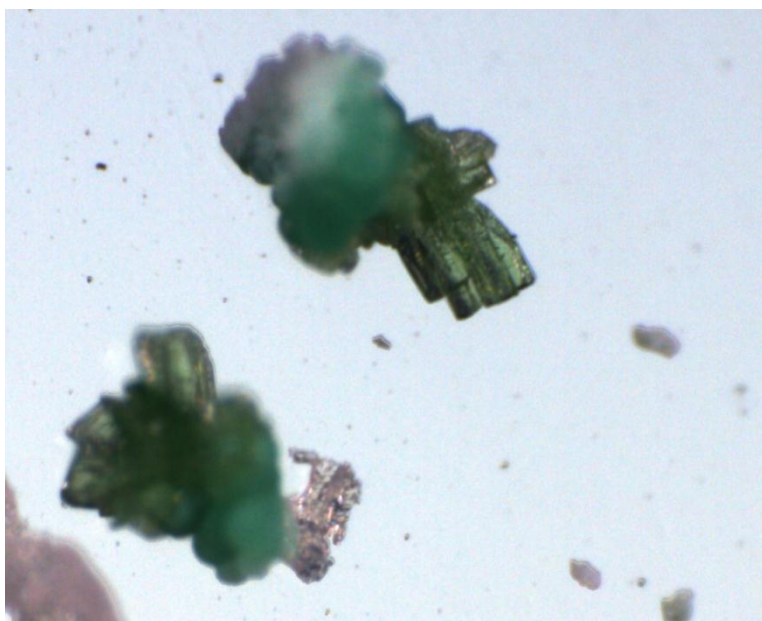

**Figure 1.4.2:** Picture of the crystals of Ba[U<sup>IV</sup>(PO<sub>4</sub>)<sub>2</sub>].

**Table 1.4.2:** Bond Valence Sum (BVS) calculations for Ba[U<sup>IV</sup>(PO<sub>4</sub>)<sub>2</sub>].<sup>2</sup>

vu = exp[(R0 - d)/b].

| Phosphate  |          |           |       | U(IV)      |          |           |           | Ba          |          |             |       | Total       |              |       |              |
|------------|----------|-----------|-------|------------|----------|-----------|-----------|-------------|----------|-------------|-------|-------------|--------------|-------|--------------|
| R(0) : P-O | distance | vu        |       | R(0) : U-O | distance | vu        |           | R(0) : Ba-O | distance | vu          |       |             |              |       |              |
| b          | 1.604    | P(1)-O(1) | 1.541 | 1.186      | 2.112    | U(1)-O(1) | 2.456     | 0.395       | 2.29     | Ba(1A)-O(1) | 2.826 | 0.235       | <b>1.815</b> |       |              |
|            | 0.37     | P(1)-O(2) | 1.517 | 1.265      | b        | 0.37      | U(1)-O(2) | 2.23        | 0.727    | b           | 0.37  | Ba(1A)-O(2) | 3.296        | 0.066 | <b>2.058</b> |

|                     |  |                 |       |           |       |              |                                                                      |
|---------------------|--|-----------------|-------|-----------|-------|--------------|----------------------------------------------------------------------|
| P1-O1,O1,O2,O2      |  | R(0) : U-O      | 2.051 | U(1)-O(1) | 2.456 | 0.395        | BVS for Phosphate<br>Should Equal 5+ for PO4<br><b>P(1)BVS</b> 4.901 |
| <b>H(P1)= 0.254</b> |  | b               | 0.519 | U(1)-O(1) | 2.456 | 0.395        |                                                                      |
| Zero Protons        |  |                 |       | U(1)-O(1) | 2.456 | 0.395        |                                                                      |
|                     |  |                 |       | U(1)-O(1) | 2.456 | 0.395        |                                                                      |
|                     |  |                 |       | U(1)-O(2) | 2.23  | 0.727        |                                                                      |
|                     |  |                 |       | U(1)-O(2) | 2.23  | 0.727        |                                                                      |
|                     |  |                 |       | U(1)-O(2) | 2.23  | 0.727        |                                                                      |
|                     |  |                 |       | U(1)-O(2) | 2.23  | 0.727        |                                                                      |
|                     |  | <b>U(1) BVS</b> |       |           |       | <b>4.486</b> |                                                                      |

**Table 1.6.3:** Shape8 calculations for U1 in Ba[U<sup>IV</sup>(PO<sub>4</sub>)<sub>2</sub>].<sup>4</sup>

|           | <b>D4d</b> | <b>C2v</b> | <b>D2d</b> |
|-----------|------------|------------|------------|
| <b>U1</b> | 20.0243    | 14.6568    | 10.5861    |

## Section 2: References.

1. (a) J. T. Bell, R. E. Biggers, *J. Mol. Spectrosc.* 1965, **18**, 247. (b) H. D. Burrows, T. J. Kemp, *Chem. Soc. Rev.* 1974, **3**, 139.
2. (a) I. D. Brown, D. Altematt, *Acta Crystallogr., Sect. B: Struct. Sci.* 1985, **41**, 244. (b) N. E. Brese, M. O’Keeffe, *Acta Crystallogr., Sect. B: Struct. Sci.* 1991, **47**, 192. (c) J. Loub, *Acta Crystallogr., Sect. B: Struct. Sci.* 1991, **47**, 468. (d) P. C. Burns, R. C. Ewing, F. C. Hawthorne, *Can. Mineral.* 1997, **35**, 1551. (e) A. J. Locock, P. C. Burns, *Z. Kristallogr.* 2004, **219**, 259. (f) I. D. Brown, *Chem. Rev.* 2009, **109**, 12.
3. D. Cohen, W. T. Carnall, *J. Phys. Chem.* 1960, **64**, 1933.
4. (a) D. L. Kepert, *Prog. Inorg. Chem.* 1978, **24**, 179. (b) J. Xu, E. Radkov, M. Ziegler, K. N. Raymond, *Inorg. Chem.* 2000, **39**, 4156. (c) A. V. Gordon, J. Xu, K. N. Raymond, P. Durbin, *Chem. Rev.* 2003, **103**, 4207.
